# Supplementary material for: ANK1 is up-regulated in laser captured microglia in Alzheimer’s brain; the importance of addressing cellular heterogeneity
Source: PLOS journal article supplement (doi:10.1371/journal.pone.0177814), 2017-07-12

Supplementary Figure 1

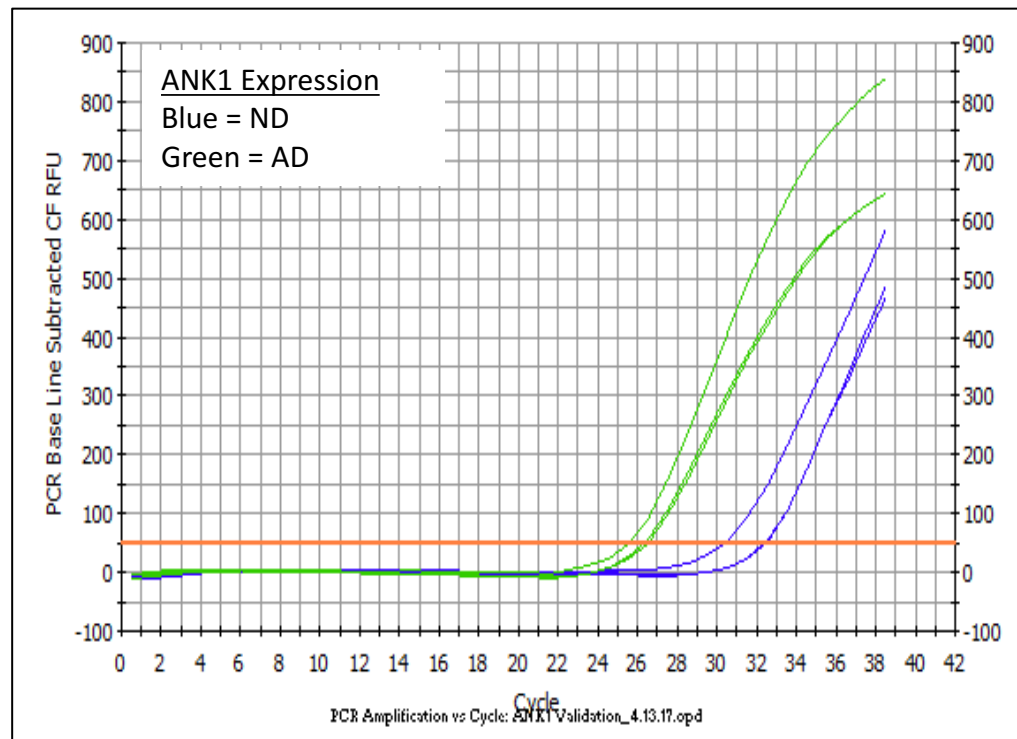

Supplement: S2 (10.1371/journal.pone.0177814.s002) [file journal.pone.0177814.s002]
